# Supplementary material for: Transition-metal-free synthesis and photophysical studies of highly functionalized (E)-stilbenes
Source: Royal Society of Chemistry journal article supplement (doi:10.1039/d3nj03458e), 2023-11-21

## Metal-free Synthesis and Photophysical Studies of Highly Functionalized (*E*)-Stilbenes

Ritu Mamgain, Gana R.J., Abhrajeev Malik and Fateh V. Singh\*<sup>a</sup>

*Chemistry Division, School of Advanced Sciences, VIT-Chennai, Vandalur-Kelambakkam Road, Chennai-600127, Tamil Nadu, India*

*Phone: +91 44 3993 1472; E-mail: [fatehveer.singh@vit.ac.in](mailto:fatehveer.singh@vit.ac.in)*

|                                                                             |       |
|-----------------------------------------------------------------------------|-------|
| <sup>1</sup> H NMR and <sup>13</sup> C NMR spectra of compound <b>17a-j</b> | 2-21  |
| Tauc's plots of <b>17a-j</b>                                                | 22-23 |

**(E)-3-(4-(dimethylamino)styryl)-5-(piperidin-1-yl)-[1,1'-biphenyl]-4-carbonitrile (17a)**

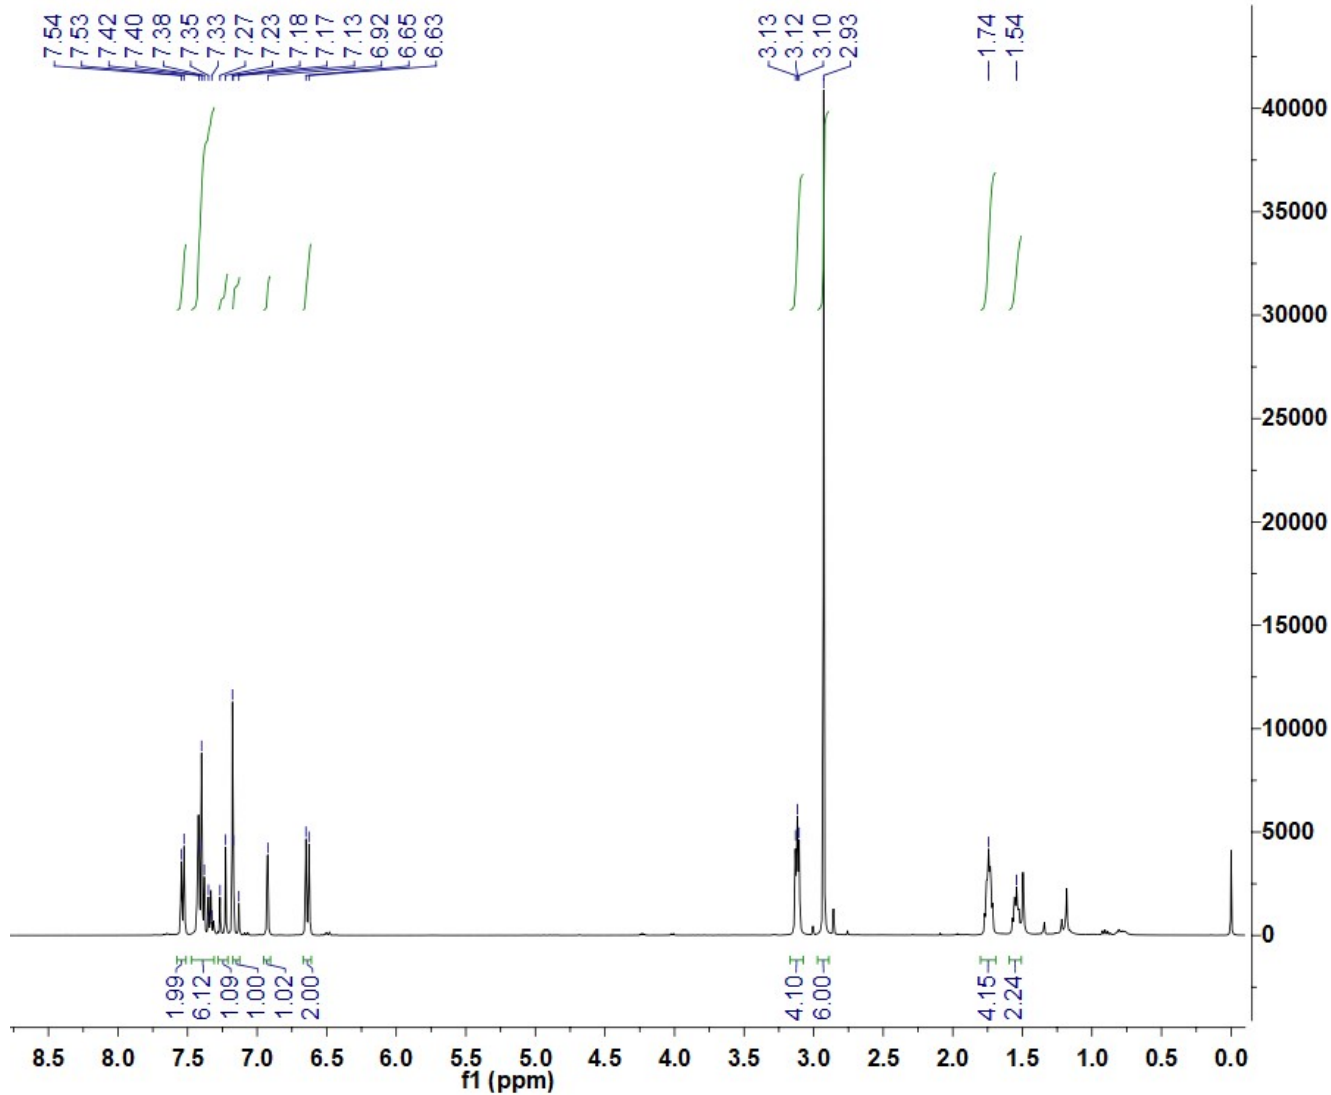

**(E)-3-(4-(dimethylamino)styryl)-5-(piperidin-1-yl)-[1,1'-biphenyl]-4-carbonitrile (17a)**

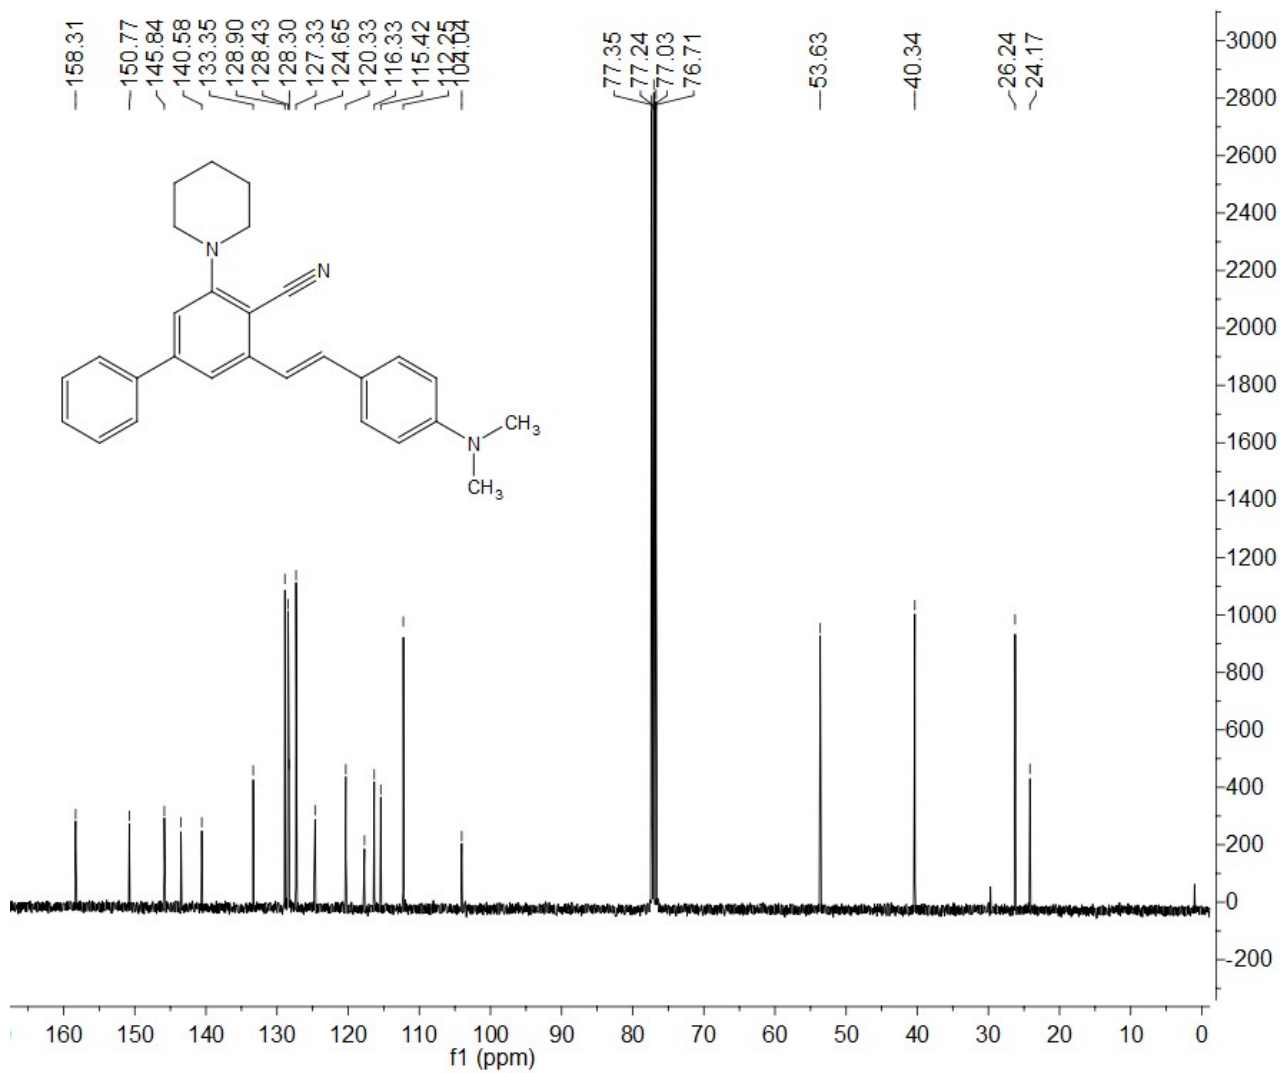

**(E)-4'-bromo-3-(4-(dimethylamino)styryl)-5-(piperidin-1-yl)-[1,1'-biphenyl]-4-carbonitrile 17b**

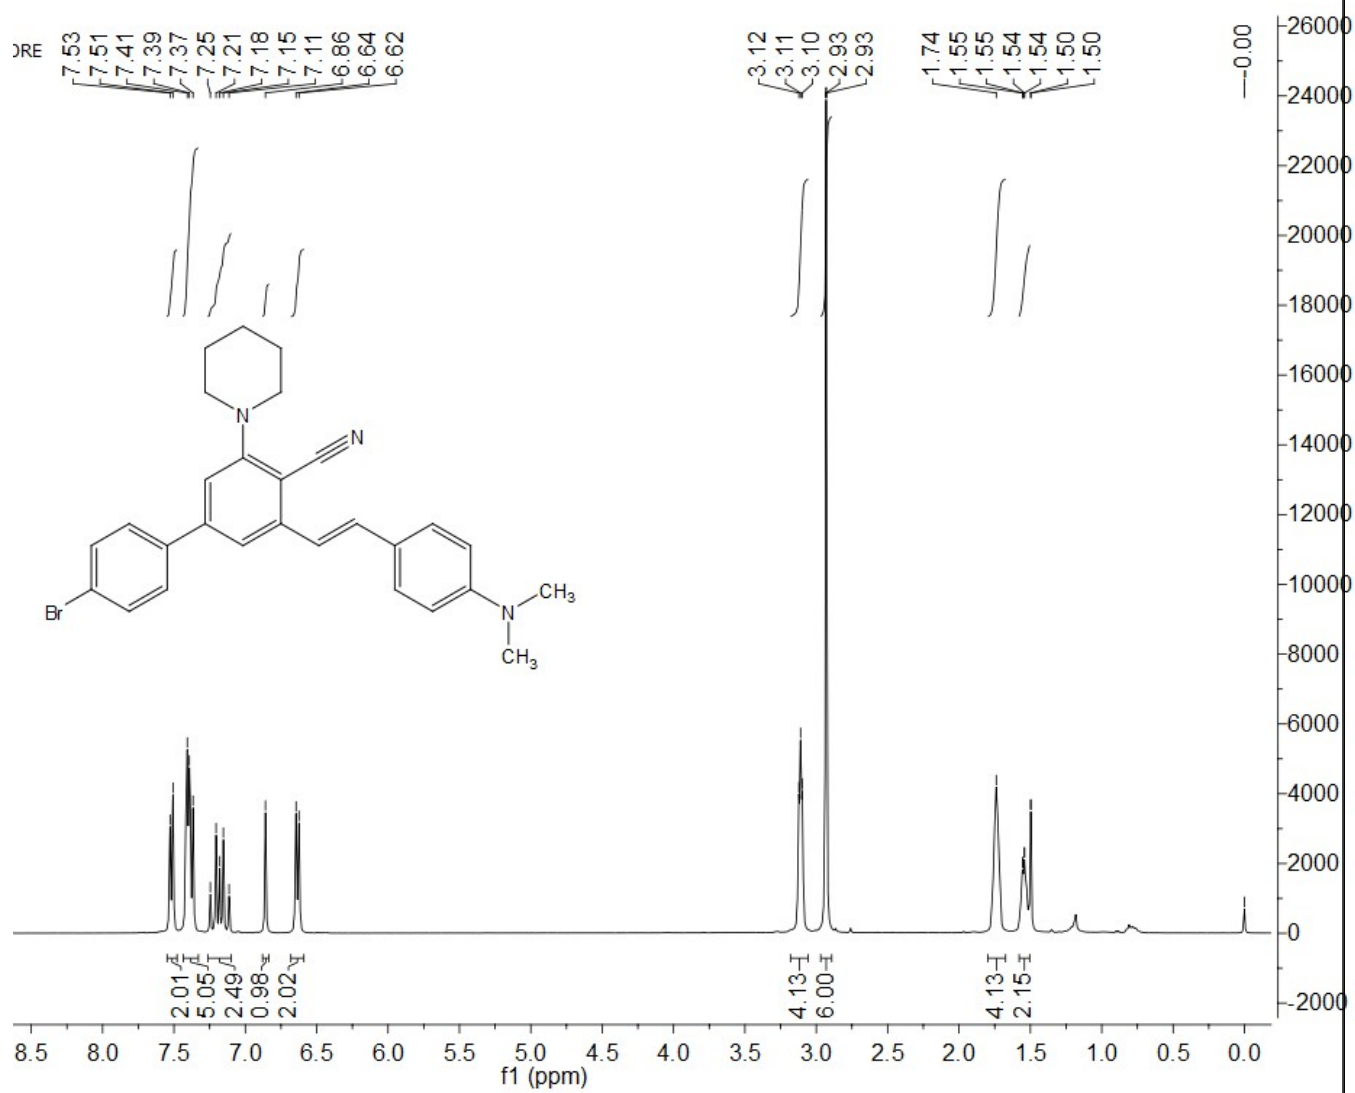

**(E)-4'-bromo-3-(4-(dimethylamino)styryl)-5-(piperidin-1-yl)-[1,1'-biphenyl]-4-carbonitrile 17b**

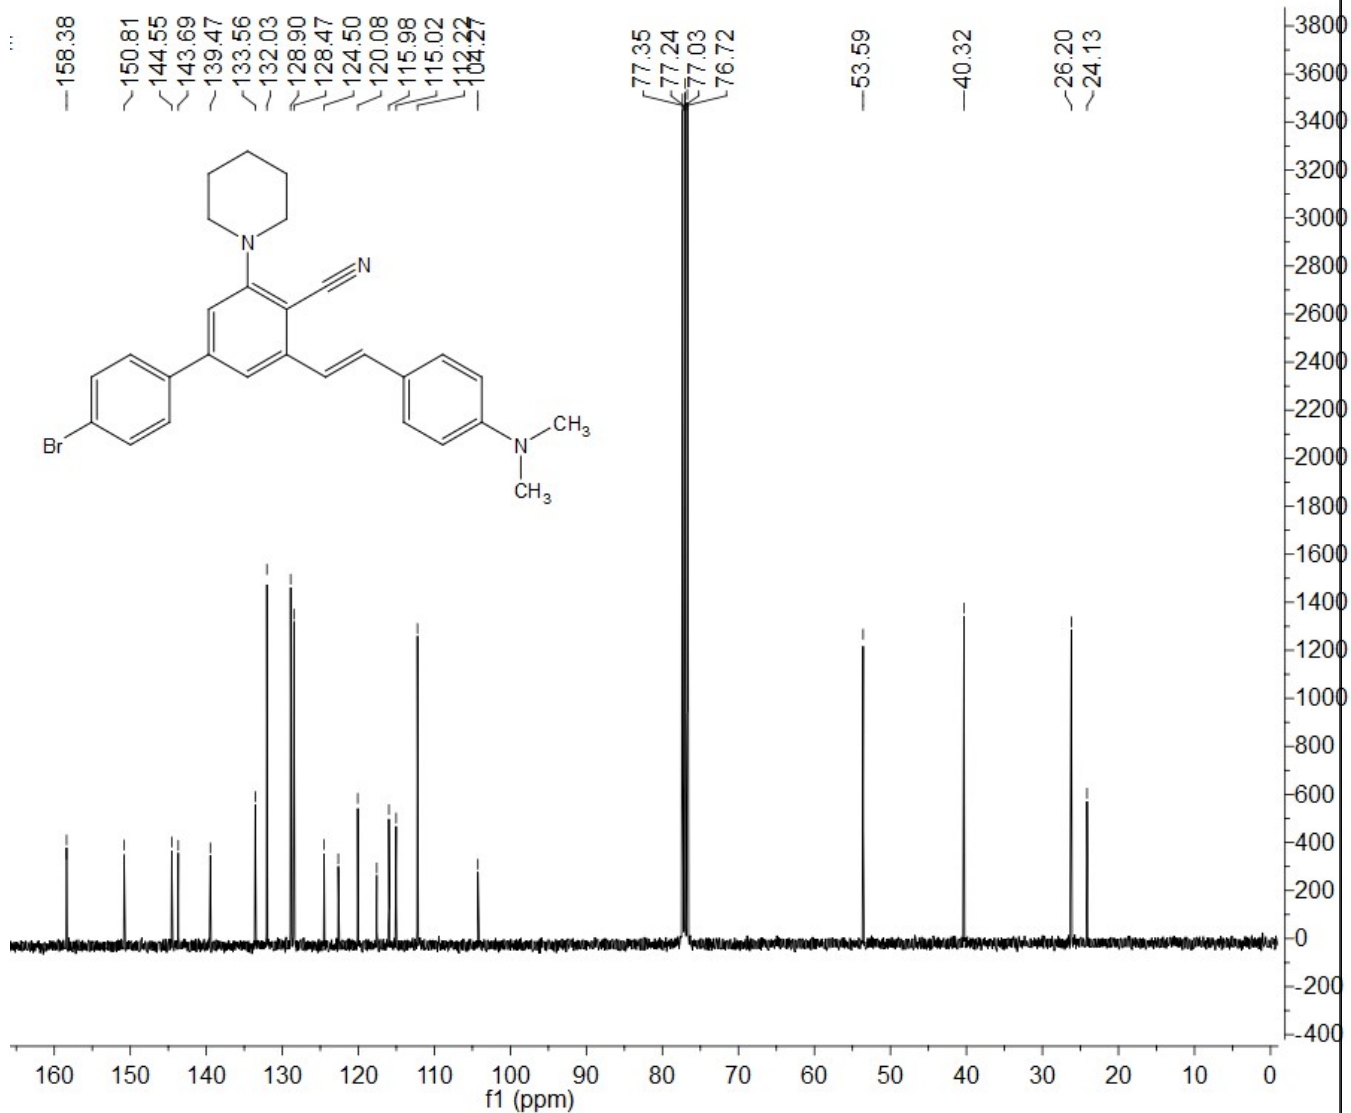

*(E)*-3-(4-(dimethylamino)styryl)-4'-fluoro-5-(piperidin-1-yl)-[1,1'-biphenyl]-4-carbonitrile 17c

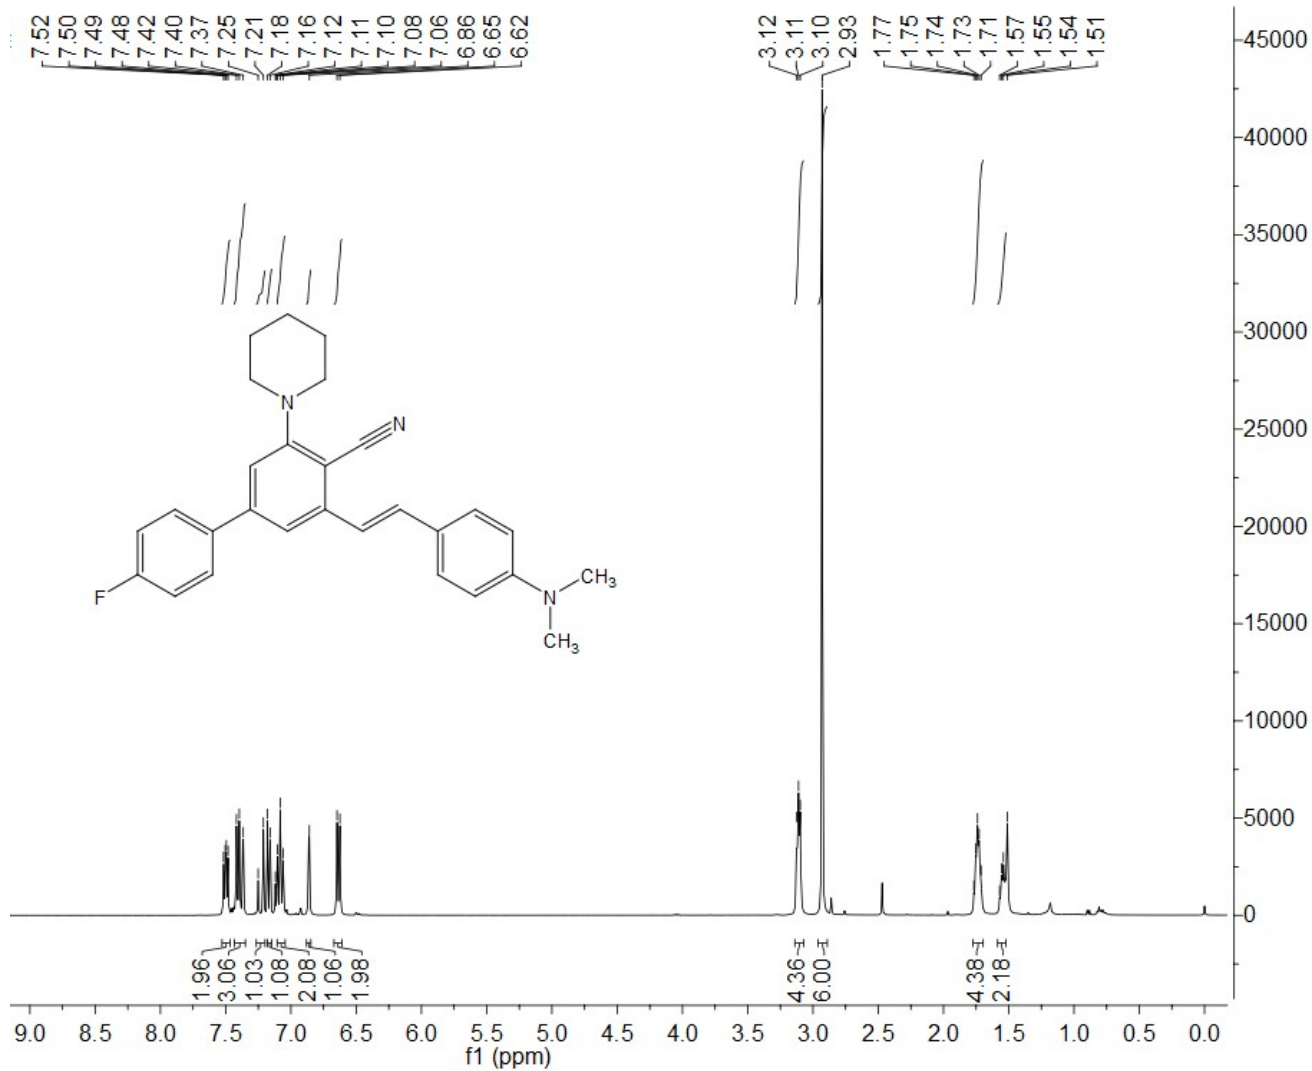

**(E)-3-(4-(dimethylamino)styryl)-4'-fluoro-5-(piperidin-1-yl)-[1,1'-biphenyl]-4-carbonitrile 17c**

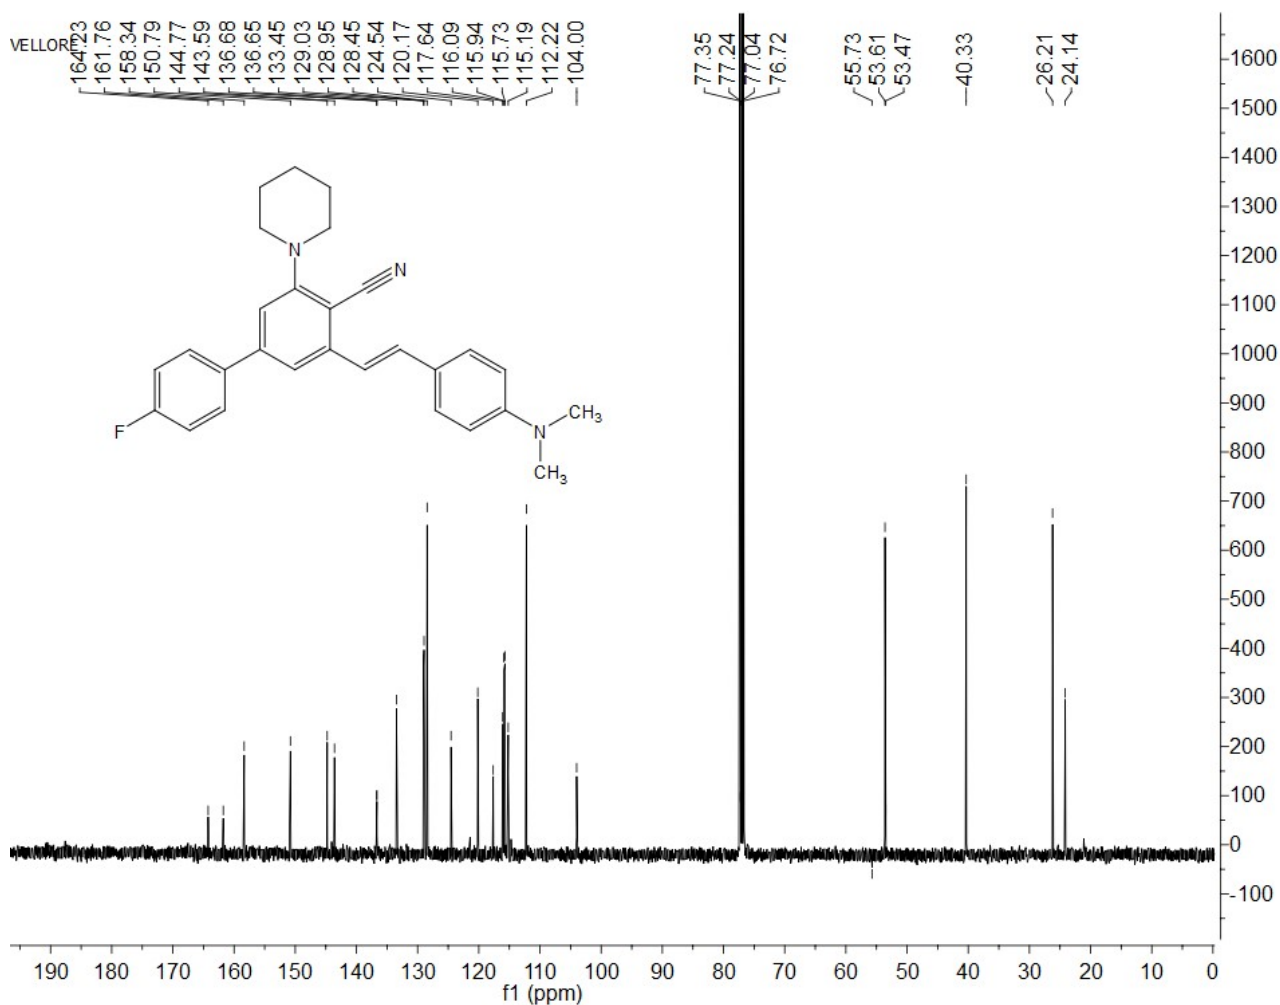

**(E)-4'-chloro-3-(4-(dimethylamino)styryl)-5-(piperidin-1-yl)-[1,1'-biphenyl]-4-carbonitrile (17d)**

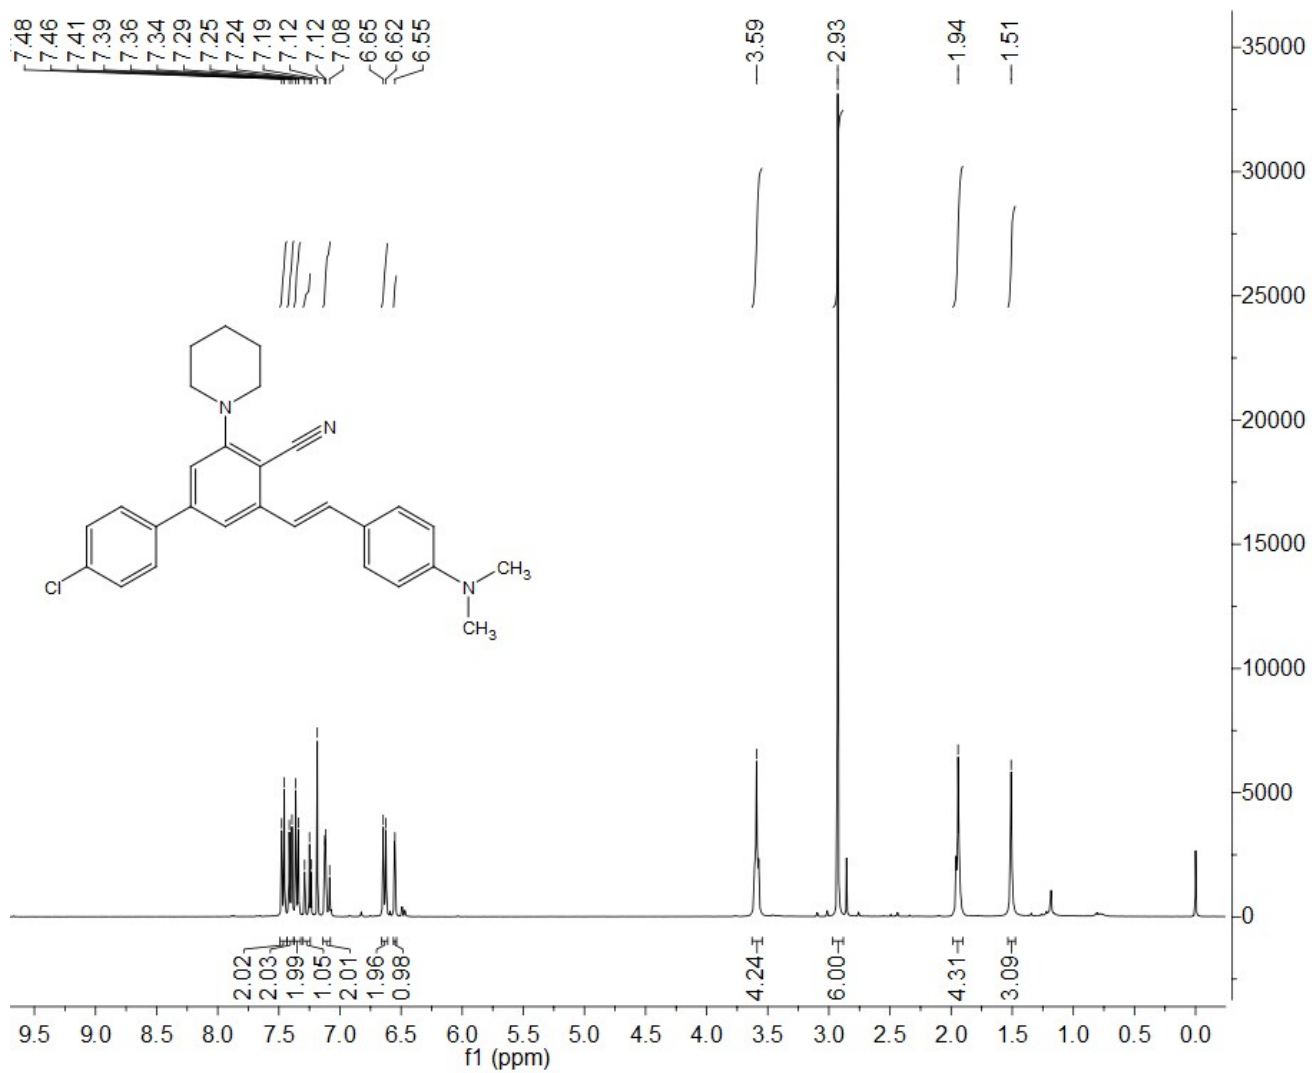



*(E)*-4'-chloro-3-(4-(dimethylamino)styryl)-5-(piperidin-1-yl)-[1,1'-biphenyl]-4-carbonitrile (17d)

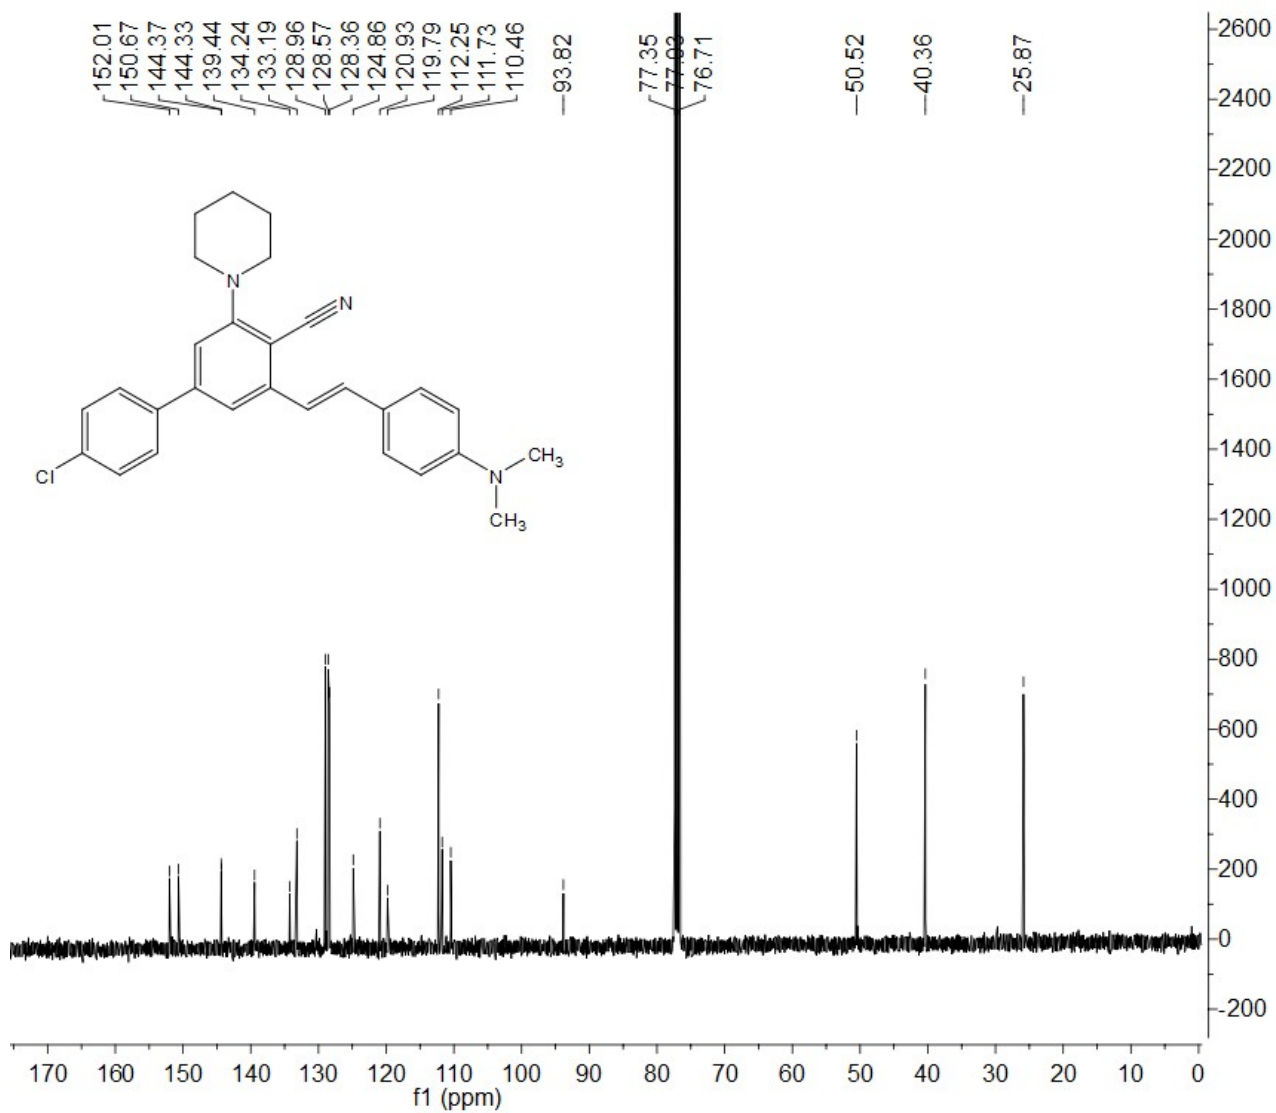

**(E)-3-(4-(dimethylamino)styryl)-4'-methoxy-5-(piperidin-1-yl)-[1,1'-biphenyl]-4-carbonitrile (17e)**

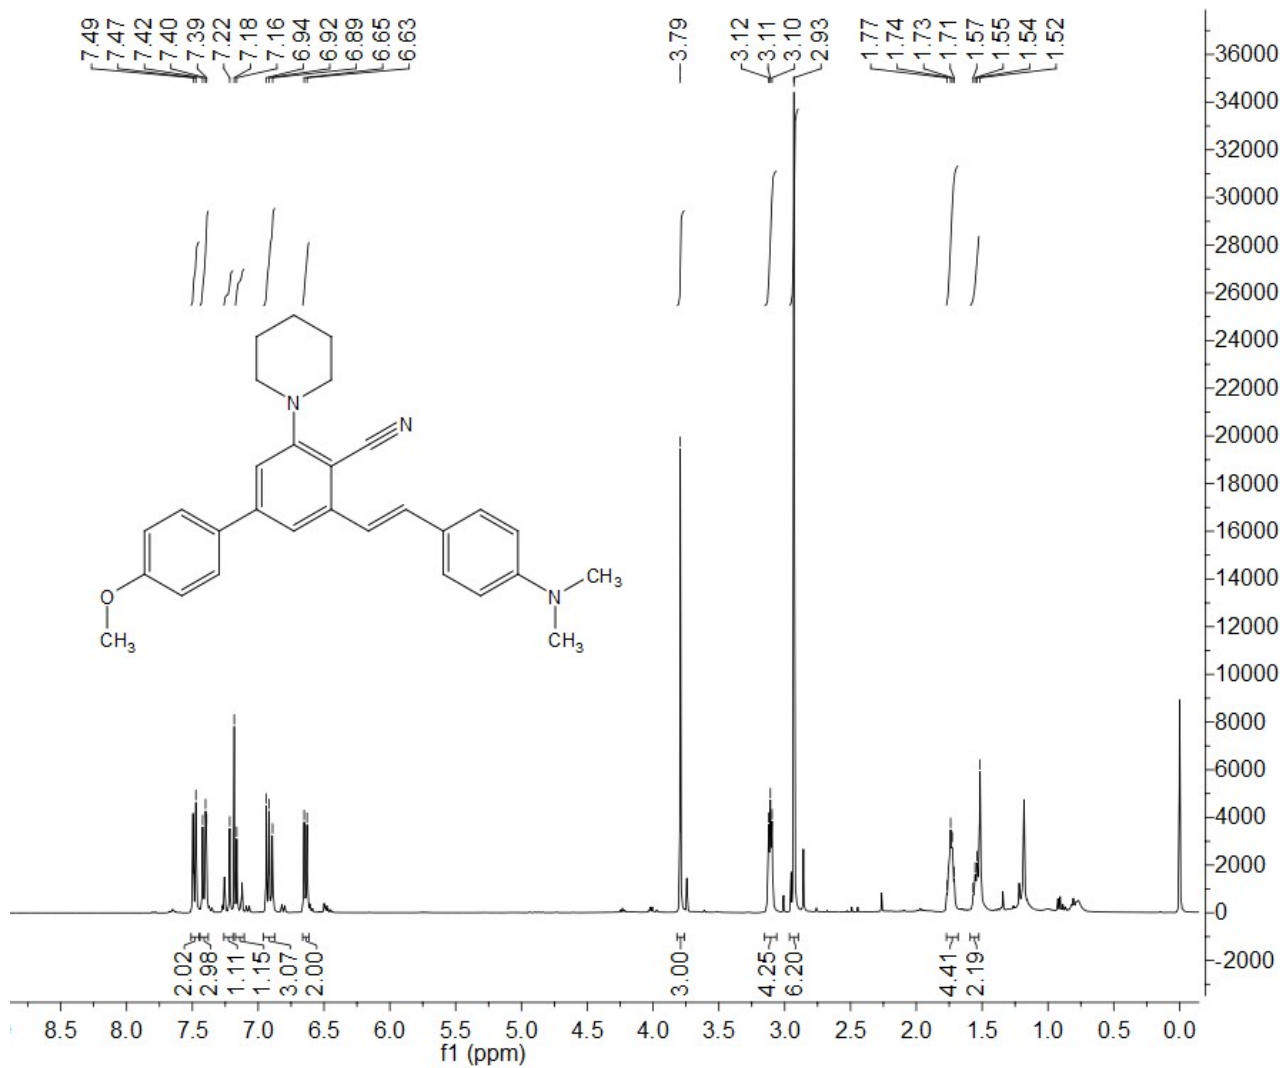

**(E)-3-(4-(dimethylamino)styryl)-4'-methoxy-5-(piperidin-1-yl)-[1,1'-biphenyl]-4-carbonitrile (17e)**

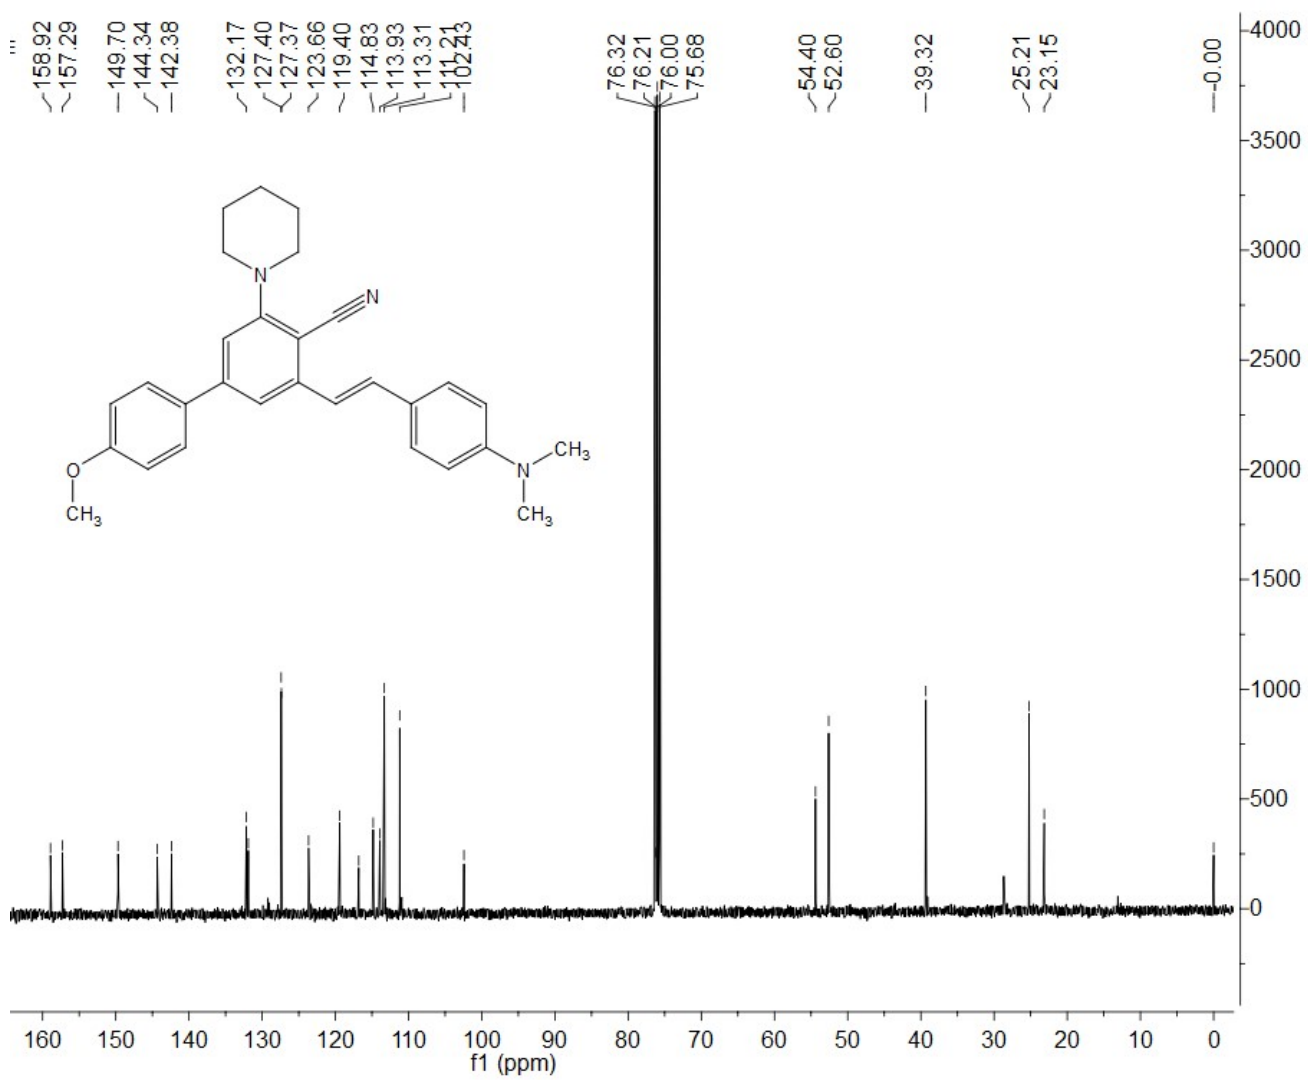

**(E)-2-(4-(dimethylamino)styryl)-4-(naphthalen-1-yl)-6-(piperidin-1-yl) benzonitrile (17f)**

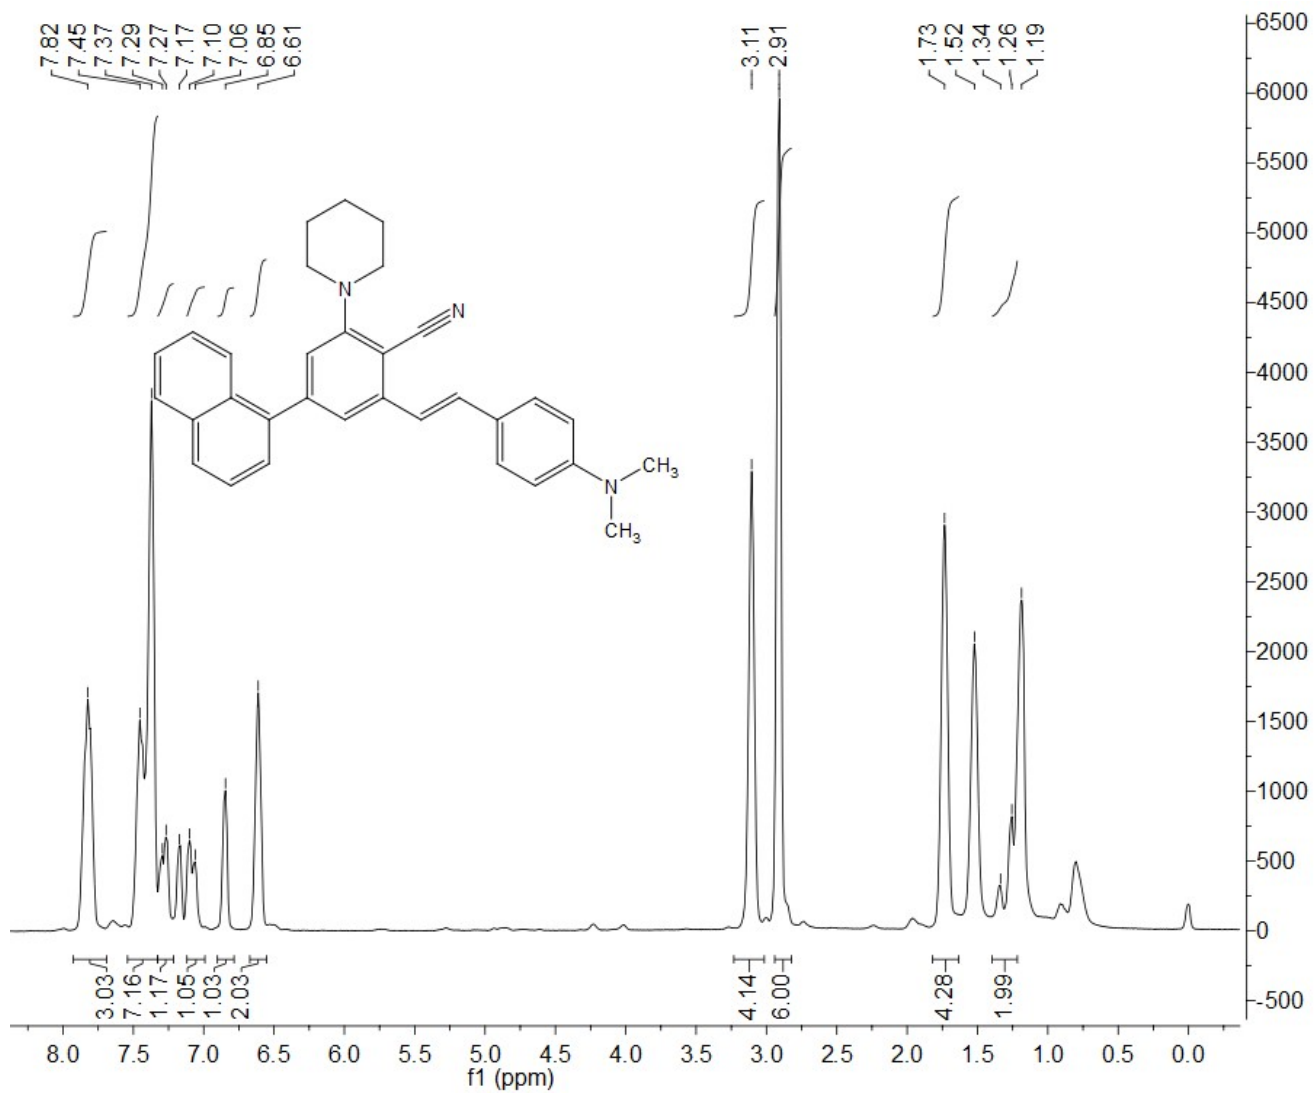

**(E)-2-(4-(dimethylamino)styryl)-4-(naphthalen-1-yl)-6-(piperidin-1-yl) benzonitrile 17f**

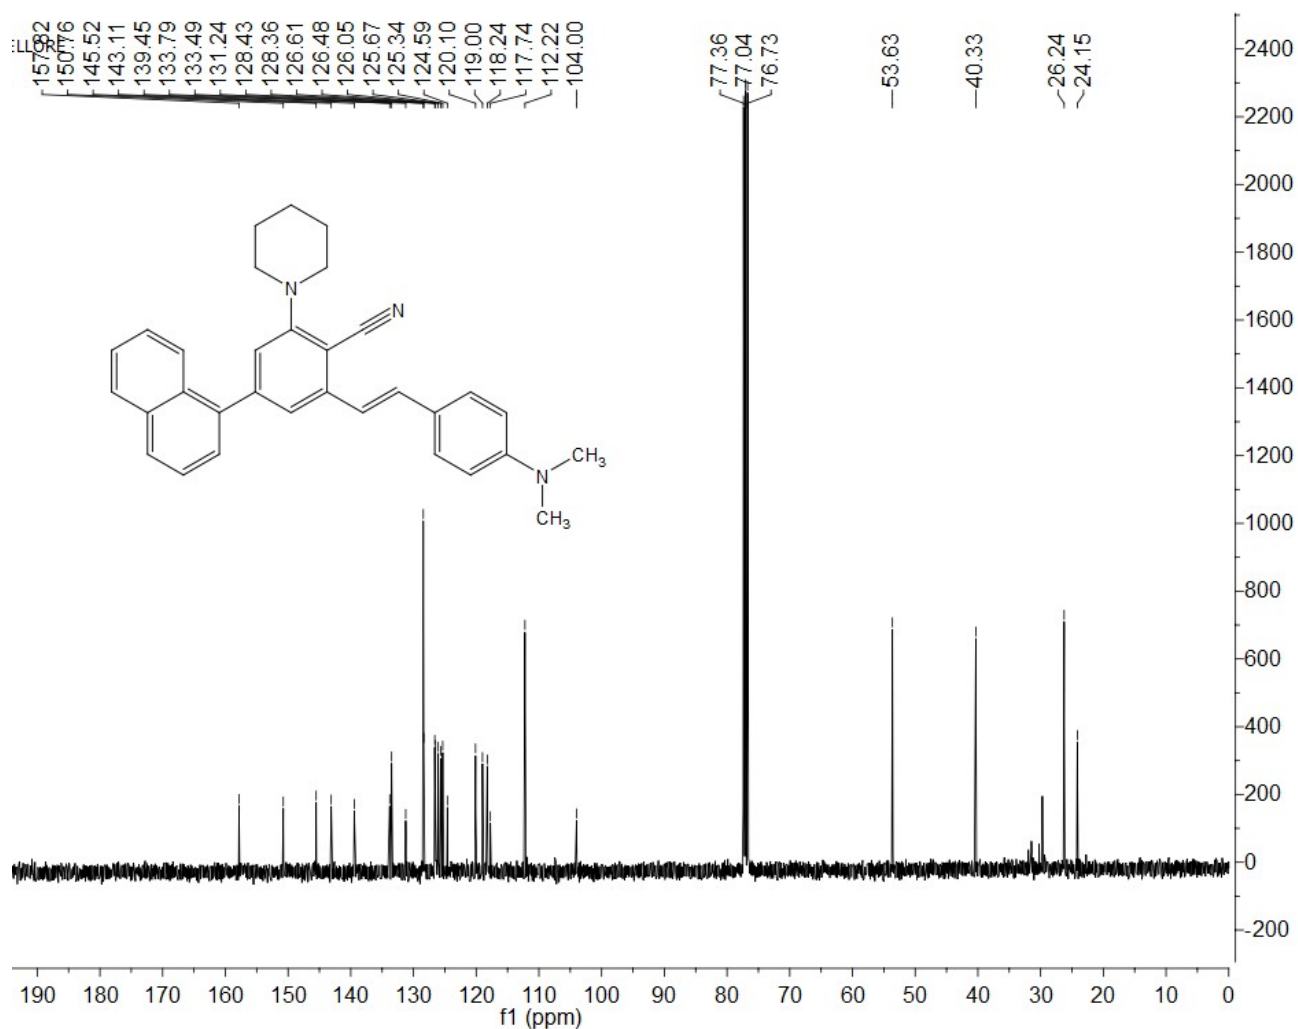

**(E)-2-(4-(dimethylamino)styryl)-6-(piperidin-1-yl)-4-(thiophen-2-yl) benzonitrile (17g)**

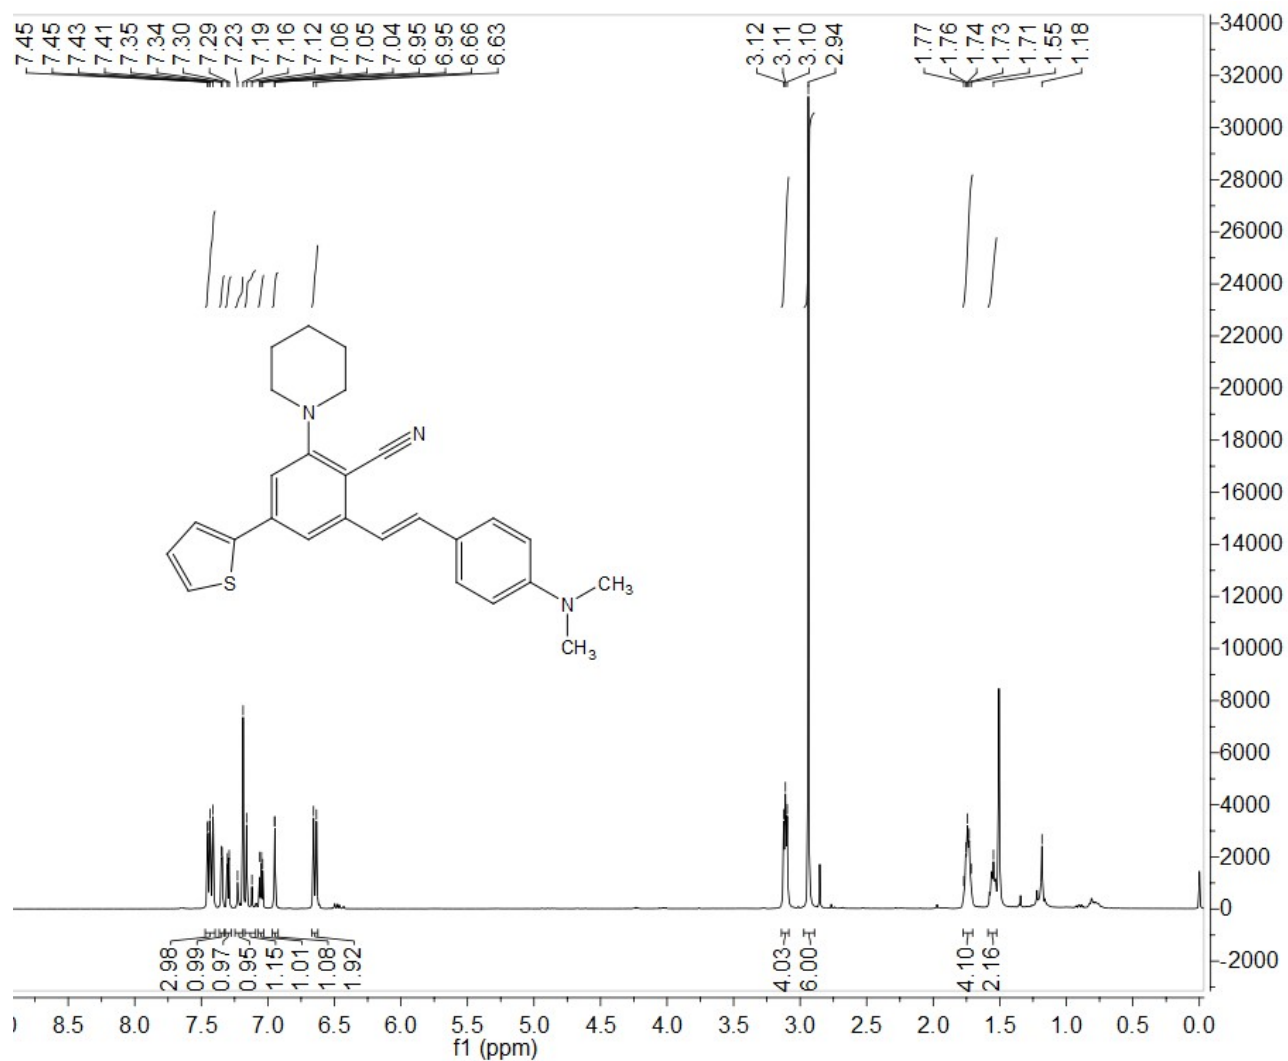

*(E)*-2-(4-(dimethylamino)styryl)-6-(piperidin-1-yl)-4-(thiophen-2-yl) benzonitrile 17g

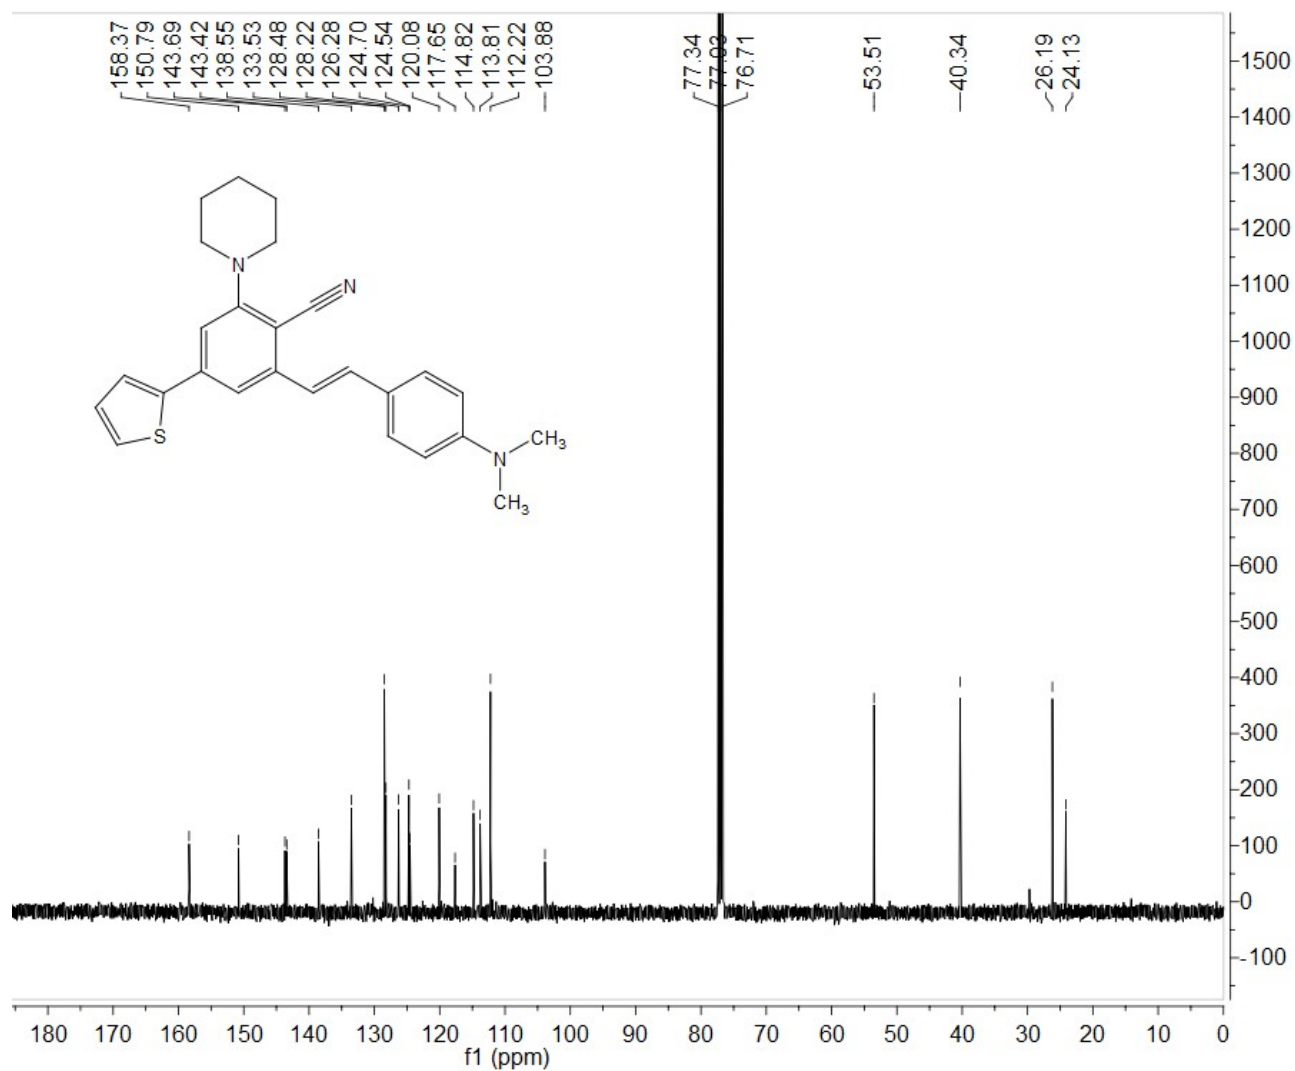

**(E)-2-(4-(dimethylamino)styryl)-6-(4-phenylpiperazin-1-yl)-4-(thiophen-2-yl)benzonitrile (17h)**

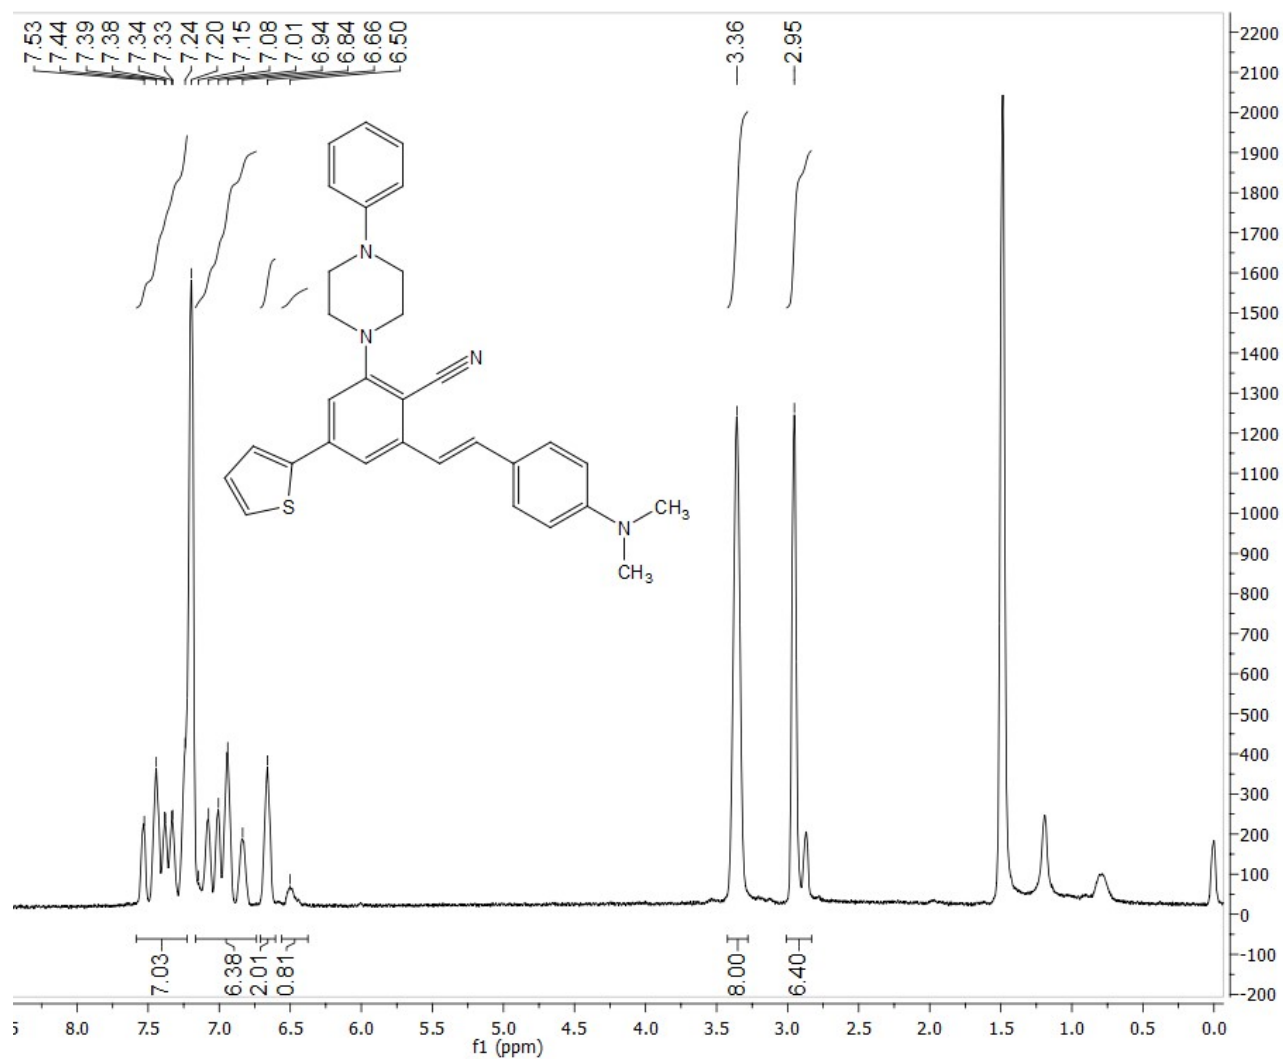



*(E)*-2-(4-(dimethylamino)styryl)-6-(4-phenylpiperazin-1-yl)-4-(thiophen-2-yl)benzonitrile (17h)

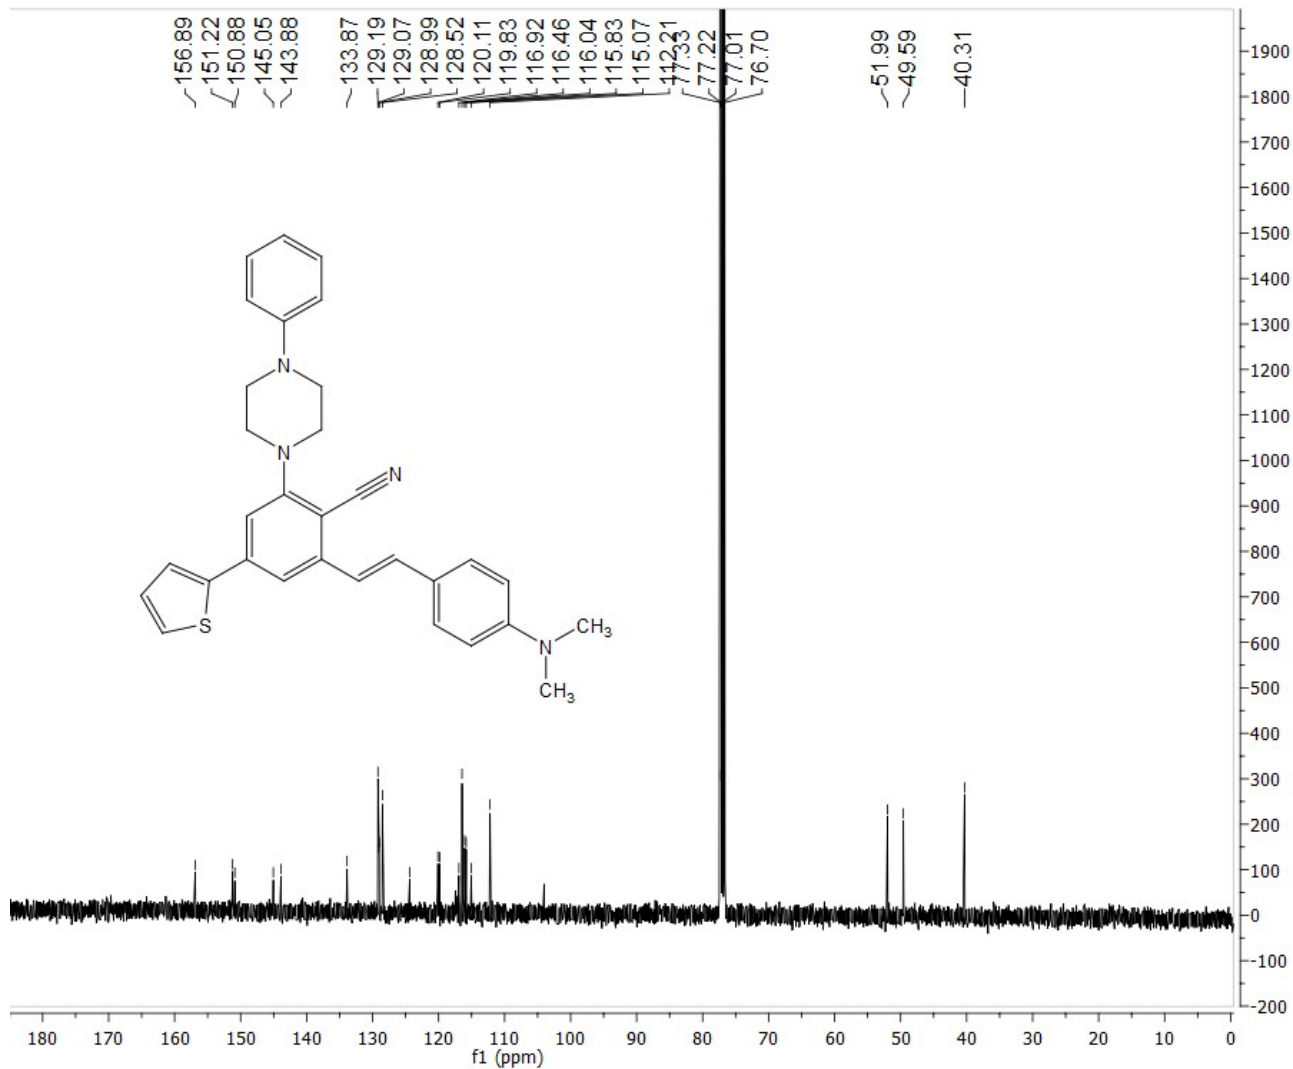

**(E)-3-(4-(dimethylamino)styryl)-4'-fluoro-5(4-phenylpiperazin-1-yl)-[1,1'-biphenyl]-4-carbonitrile (17i)**

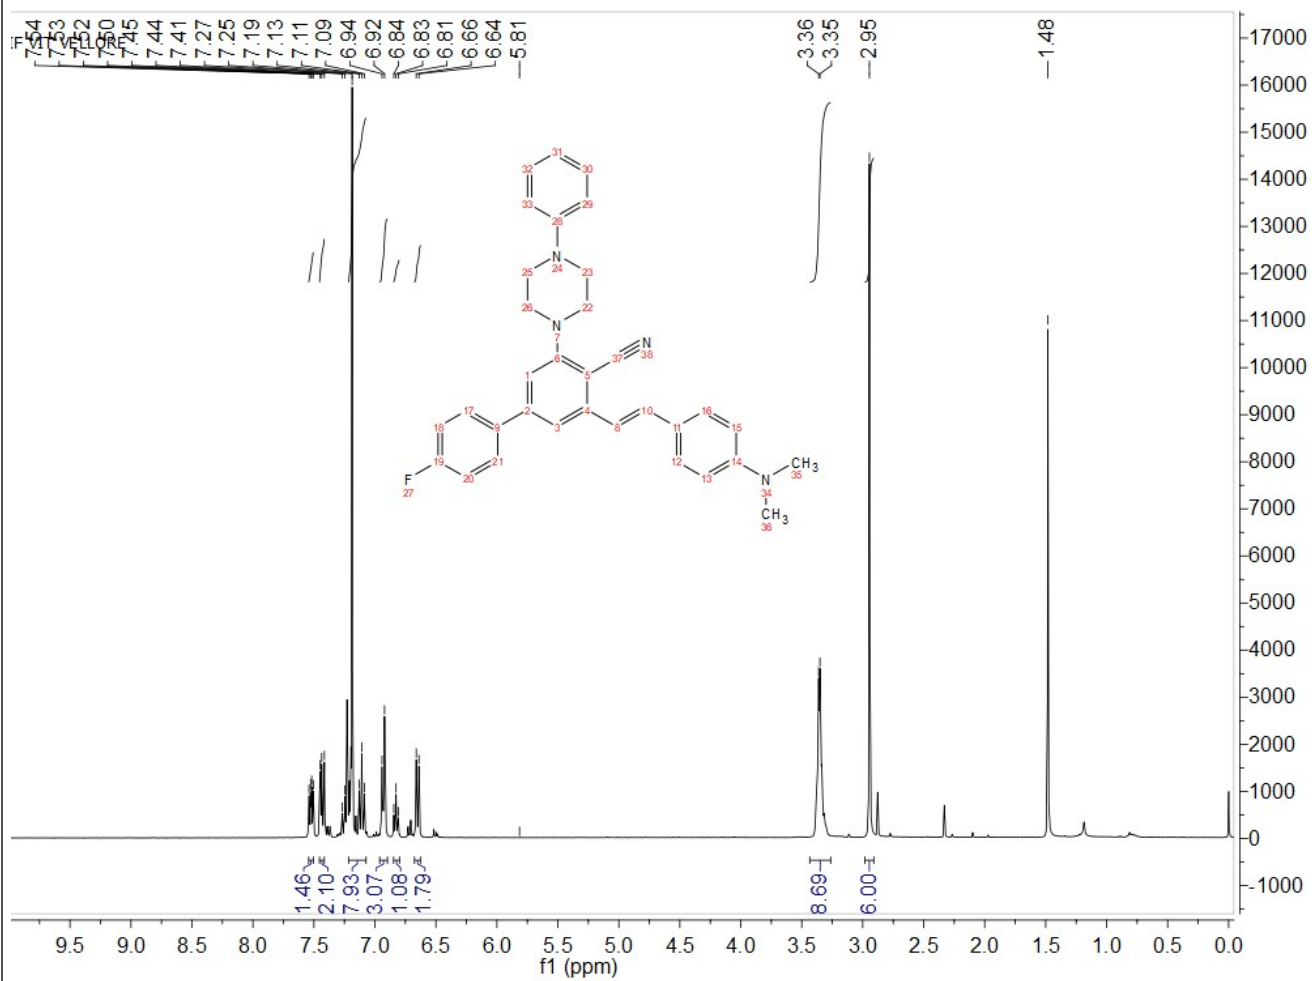

*(E)*-3-(4-(dimethylamino)styryl)-4'-fluoro-5(4-phenylpiperazin-1-yl)-[1,1'-biphenyl]-4-carbonitrile (17i)

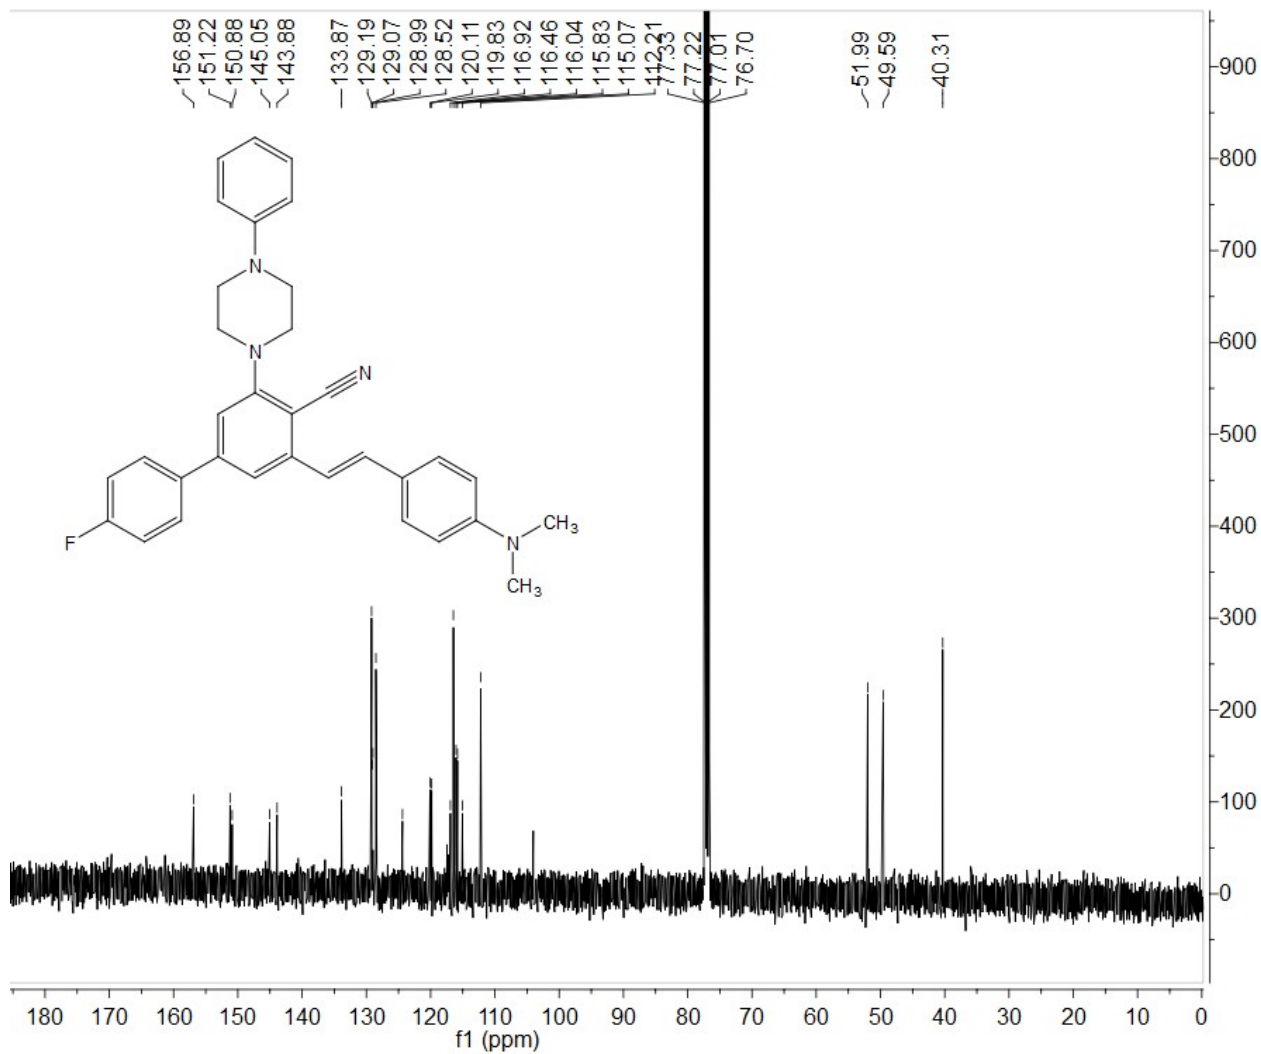

**(E)-3-(4-(dimethylamino)styryl)-4'-fluoro-5-morpholino-[1,1'-biphenyl]-4-carbonitrile (17j)**

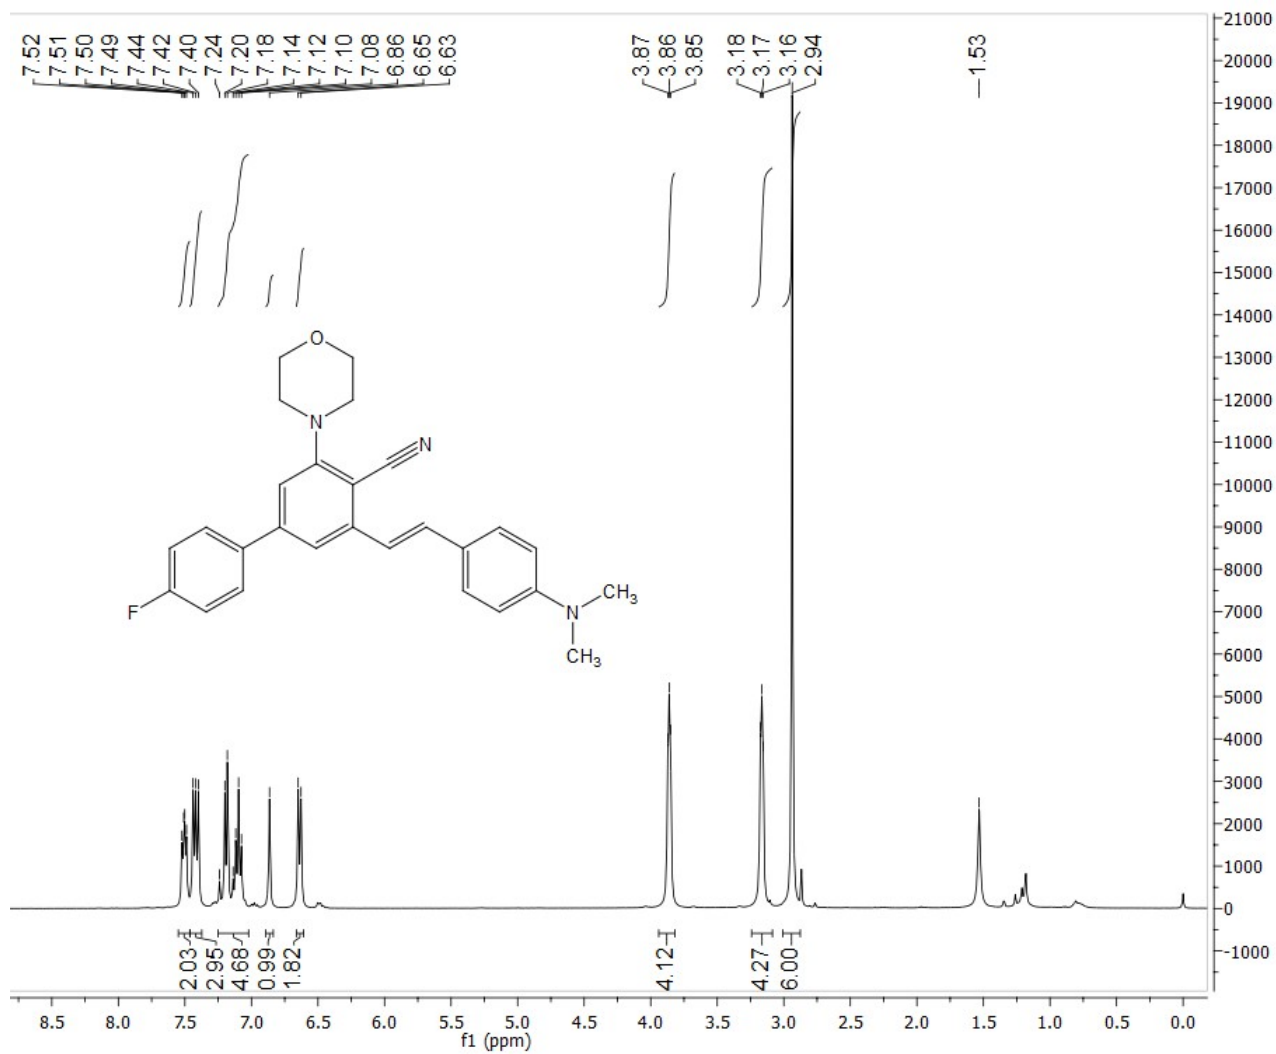

**(E)-3-(4-(dimethylamino)styryl)-4'-fluoro-5-morpholino-[1,1'-biphenyl]-4-carbonitrile (17j)**

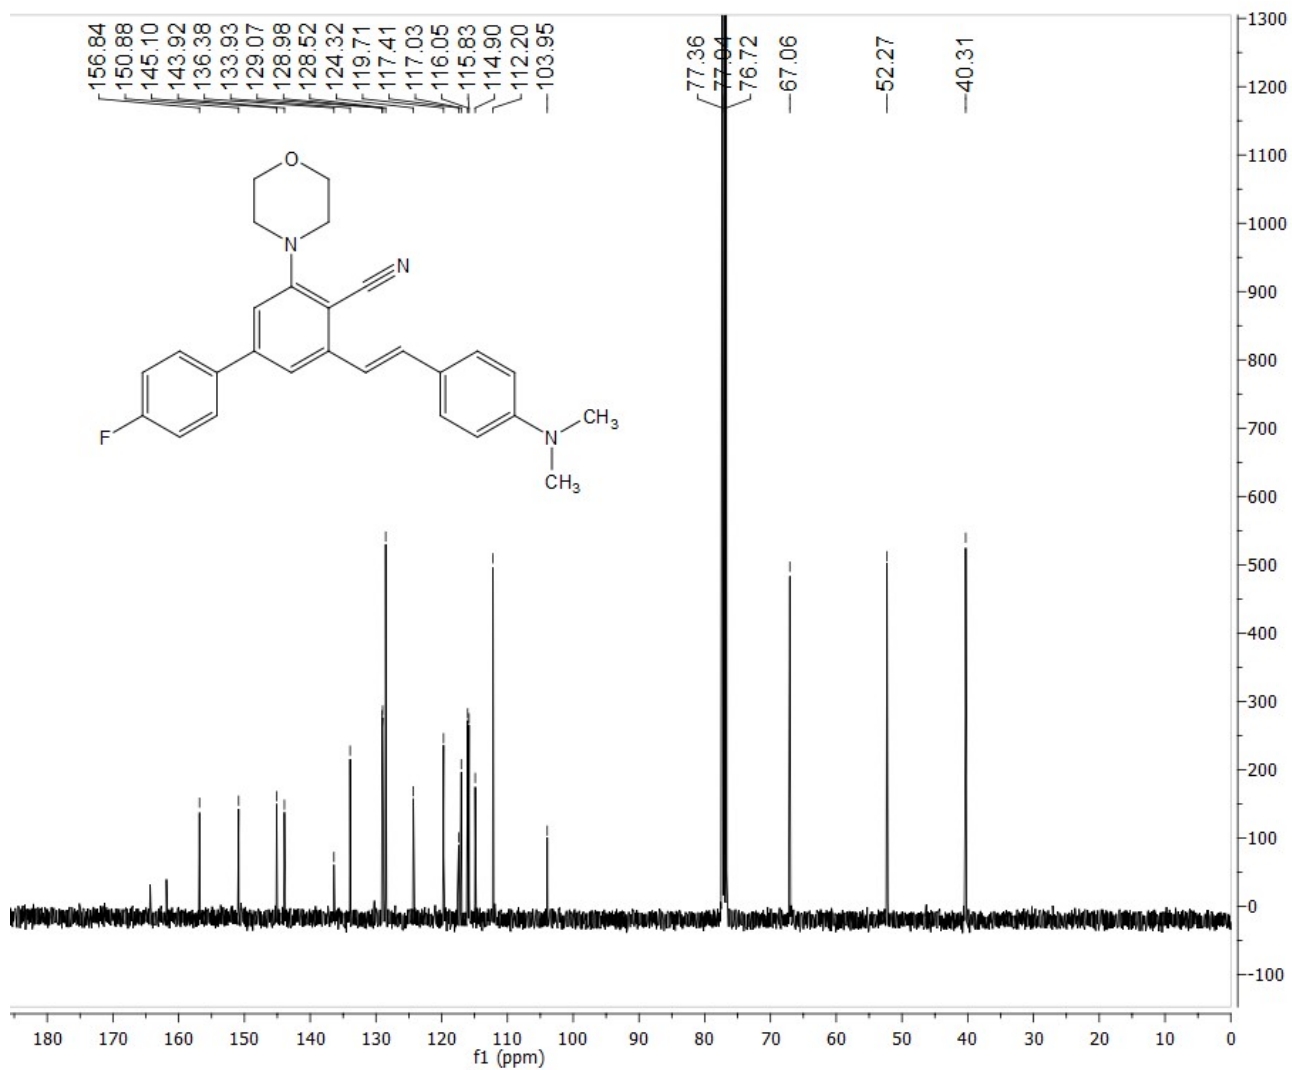

Figure 1: Tauc's plots of 17a-j

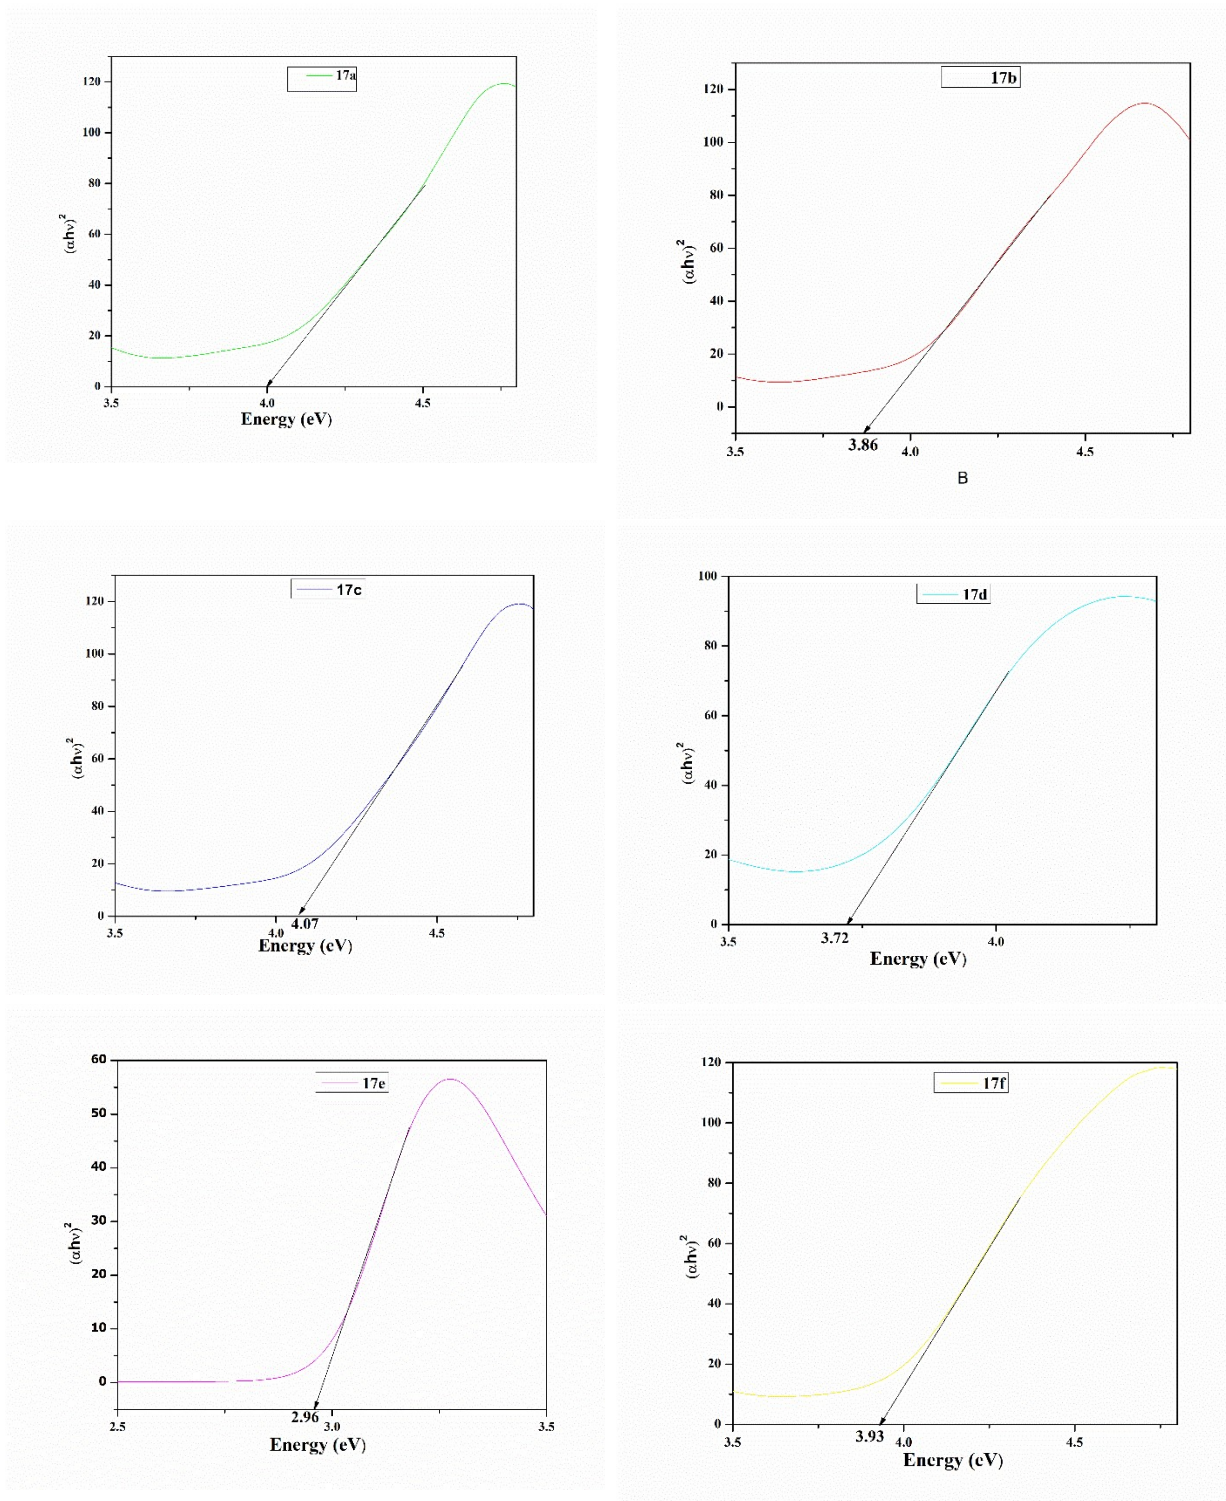

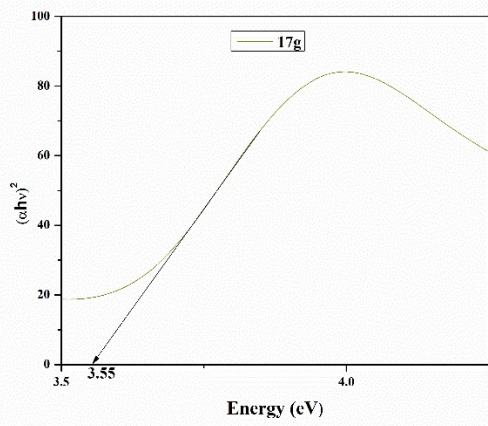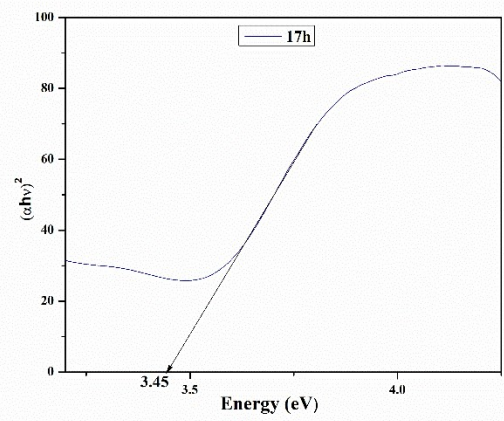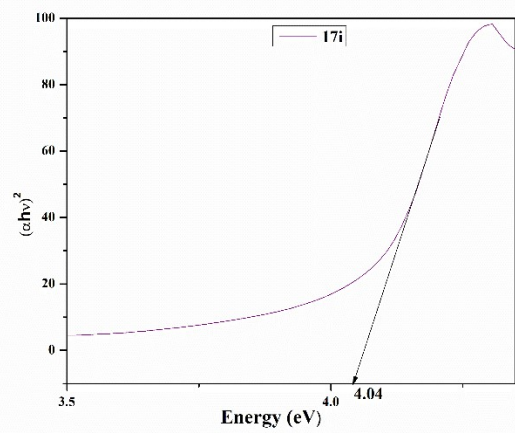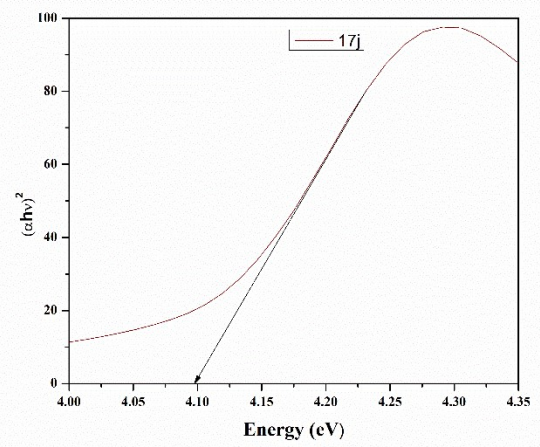

Supplement: d3nj03458e1.pdf [file d3nj03458e1.pdf]
